# Supplementary material for: miR-92a-3p Exerts Various Effects in Glioma and Glioma Stem-Like Cells Specifically Targeting CDH1/β-Catenin and Notch-1/Akt Signaling Pathways
Source: MDPI journal article supplement (doi:10.3390/ijms17111799), 2016-10-27
Supplement: s1 [file s1]

# Supplementary Material: miR-92a-3p Exerts Various Effects in Glioma and Glioma Stem-Like Cells Specifically Targeting CDH1/ $\beta$ -Catenin and Notch-1/Akt Signaling Pathways

Hang Song, Yao Zhang, Na Liu, Sheng Zhao, Yan Kong and Liudi Yuan

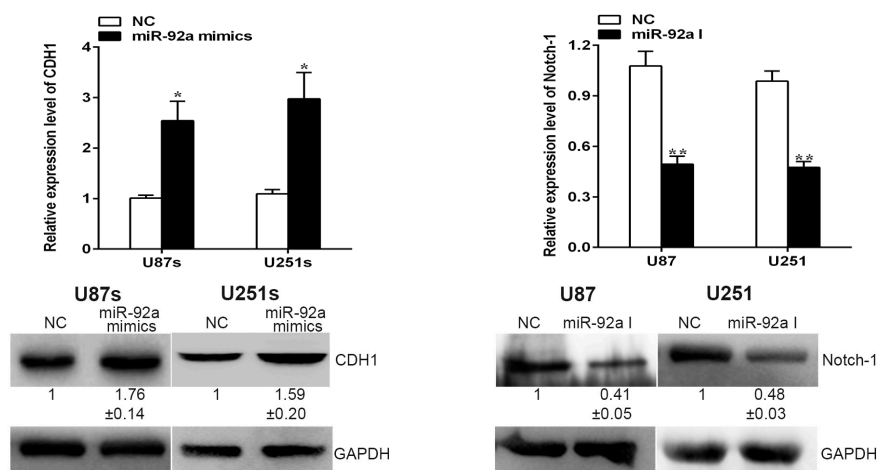

**Figure S1.** The mRNA and protein expression levels of CDH1 and Notch-1 were positively correlated with miR-92a in GSCs and glioma cells, respectively. \* indicates  $p < 0.05$ , \*\* indicates  $p < 0.01$ .

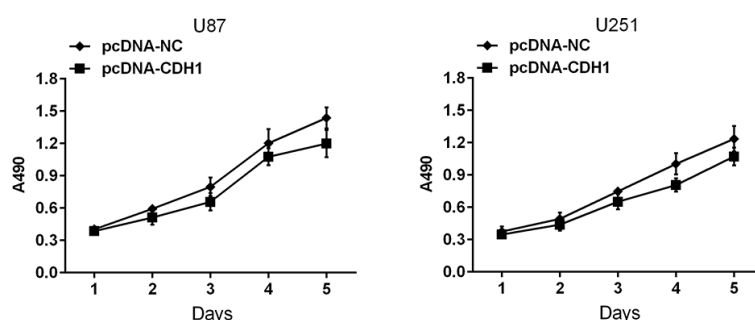

**Figure S2.** The effect of CDH1 on the proliferation of glioma cells in vitro.

**Table S1.** Top 10 miR-92a-3p's targets predicted by Targetscan and Microna.org. These genes are mostly involved in cell proliferation, migration, invasion, or self-renewal ability of stem cells.

| MicroRNA   | Gene ID | Gene    |
|------------|---------|---------|
| miR-92a-3p | 1,0114  | HIPK3   |
| miR-92a-3p | 1,0140  | TOB1    |
| miR-92a-3p | 1028    | CDKN1C  |
| miR-92a-3p | 999     | CDH1    |
| miR-92a-3p | 1,0365  | KLF2    |
| miR-92a-3p | 4581    | NOTCH-1 |
| miR-92a-3p | 1,0579  | TACC2   |
| miR-92a-3p | 109     | ADCY3   |
| miR-92a-3p | 1008    | CDH10   |
| miR-92a-3p | 1,0018  | BCL2L11 |
